# Supplementary material
Source: HighWire-hosted journal article supplement (http://www.qdcxjkg.com/highwire/filestream/132732/field_highwire_adjunct_files/1/ERJ-00154-2016_supplementary_table_S2.pdf)
Supplement: ERJ-00154-2016_supplementary_table_S2.pdf [file ERJ-00154-2016_supplementary_table_S2.pdf]

Supplementary table S2

|                              | AATD<br>(prevalent) | Reference<br>Population | p-value   |
|------------------------------|---------------------|-------------------------|-----------|
| Number of subjects [n]       | 590                 | 5900                    | n. a.     |
| Age [years]                  | 61.01 ± 14.57       | 61.01 ± 14.57           | n. a.     |
| Male/Female [n]              | 298/292             | 2980/2920               | n. a.     |
| Art. HTN [%]                 | 63.39%              | 52.66%                  | p < 0.001 |
| Congestive Heart Failure [%] | 22.03%              | 13.29%                  | p < 0.001 |
| Ischemic Heart Disease [%]   | 20.85%              | 16.08%                  | p = 0.003 |
| CKD [%]                      | 12.54%              | 6,63%                   | p < 0.001 |
| Depression [%]               | 31.36%              | 23,42%                  | p < 0.001 |
| Diabetes [%]                 | 27.29%              | 18,53%                  | p < 0.001 |
| Osteoporosis [%]             | 16.27%              | 8.78%                   | p < 0.001 |
| GERD [%]                     | 23.1%               | 14.93%                  | p < 0.001 |
| Lung Cancer [%]              | 2.03%               | 0,49%                   | p < 0.001 |

***The table provides the burden of comorbidity in alpha-1-antitrypsin-deficiency (AATD) patients as compared to an age- and gender-matched reference population. Data are presented as percentage values, unless otherwise stated. All p-values are calculated with the  $\chi^2$ -test for two groups. AATD: Alpha-1-antitrypsin deficiency; Art. HTN: Arterial hypertension; CKD: chronic kidney disease; GERD: gastro-oesophageal reflux disease.***
